# Supplementary material for: Photocatalytic properties of porous silicon nanowires
Source: Royal Society of Chemistry journal article supplement (doi:10.1039/c0jm00493f), 2010-01-01
Supplement: c0jm00493f.pdf [file c0jm00493f.pdf]

## Photocatalytic Properties of Porous Silicon Nanowires

Yongquan Qu,<sup>a</sup> Xing Zhong,<sup>a</sup> Yujing Li,<sup>b</sup> Lei Liao,<sup>a</sup> Yu Huang<sup>b,c</sup> and Xiangfeng Duan<sup>\*a,c</sup>

<sup>a</sup> Department of Chemistry and Biochemistry, University of California, Los Angeles, CA 90095

<sup>b</sup> Department of Materials Science and Engineering, University of California, Los Angeles, CA 90095

<sup>c</sup> California Nanosystems Institute, University of California, Los Angeles, CA 90095

\*To whom correspondence should be addressed. E-mail: [xduan@chem.ucla.edu](mailto:xduan@chem.ucla.edu)

- 1) Figure S1. Optical spectrum of the 300-W xenon light used in the photocatalytic reaction.
- 2) Figure S2. TEM image of PtNPs.
- 3) Figure S3. EDX spectrum of PtNPs-pSiNW-C catalysts.
- 4) Figure S4. Photocatalytic characteristics of fresh PtNPs-pSiNWs-C catalysts.
- 5) Figure S5. TEM image of 5 nm anatase TiO<sub>2</sub> nanoparticles.
- 6) Figure S6. Comparison of photocatalytic activities between porous SiNWs and TiO<sub>2</sub> nanoparticles.

### (1) Figure S1.

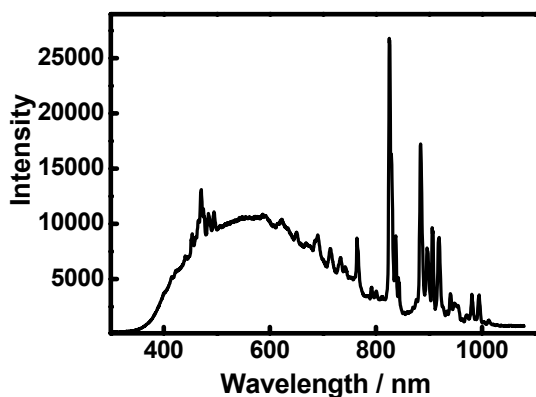

**Figure S1.** Optical spectrum of the 300 W xenon light used in the photocatalytic reaction. Our reactions are typically carried in pyrex glass vial with the UV end of Xenon light significantly weakened by glass absorption.

(2) Figure S2.

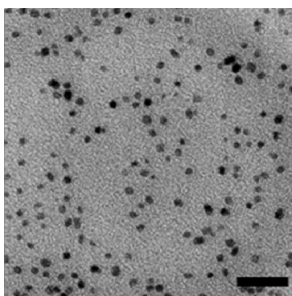

Figure S2. TEM images of platinum nanoparticles. Scale bare is 20 nm.

(3) Figure S3.

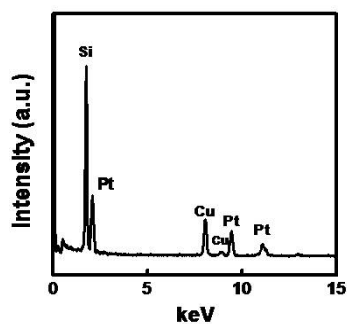

Figure S3. EDX spectrum of PtNP-pSiNW-C catalysts.

(4) Figure S4.

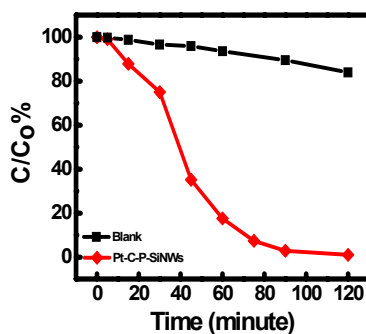

Figure S4. Photocatalytic characteristics of fresh PtNP-pSiNW-C catalysts. Black squares represent the IC solution without catalysts under the light irradiation. Red diamonds represent the catalytic behavior of the fresh PtNP-pSiNW-C.

(5) Figure S5.

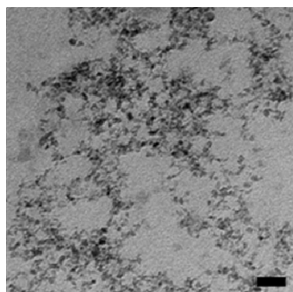

**Figure S5.** TEM image of anatase TiO<sub>2</sub> nanoparticles. Scale bare is 40 nm. To synthesize anatase TiO<sub>2</sub> nanoparticles, 5 ml of titanium-n-butoxide (Ti(OBu)<sub>4</sub>) was dissolved in 1.6 ml of isopropanol and then drop-wisely added into 40 ml of HNO<sub>3</sub> acid solution with a pH value of 2.5 under vigorous stirring. The mixture was kept at 75 °C for 24 hours. The as-synthesized TiO<sub>2</sub> nanoparticles were centrifuged off and washed with water for five times.

(6) Figure S6.

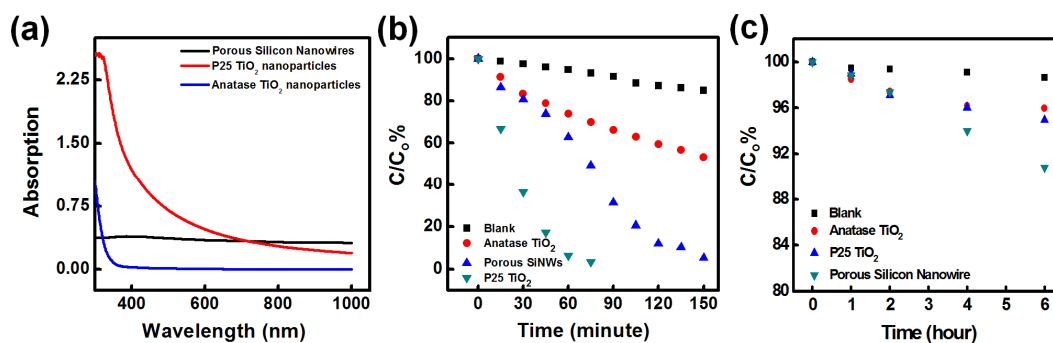

**Figure S6.** Comparison of photocatalytic activities between porous SiNWs and TiO<sub>2</sub> nanoparticles. (a) Absorption spectra of porous SiNWs, 5 nm anatase TiO<sub>2</sub> nanoparticles and P25 TiO<sub>2</sub> nanoparticles. The concentration of the catalysts was controlled at 0.1 mg/ml. (b) Photocatalytic activities of the three catalysts dispersed in 10 ml of 100 μM indigo carmine (IC) aqueous solution. 3 mg of catalysts was used for the photoreactions. (c) Photocatalytic activities under IR light with 3 mg photocatalyst dispersed in 10 ml of 20 μM IC solution for three different photocatalysts. The light was cut off at 715 nm.
